# Supplementary figures and images for: The 5′ region of Xist RNA has the potential to associate with chromatin through the A-repeat
Source: PubMed Central journal article supplement — RNA. 2017 Dec;23(12):1894–901. doi: 10.1261/rna.062158.117 (PMC5689009; doi:10.1261/rna.062158.117), 2017-12

**Figure S1**

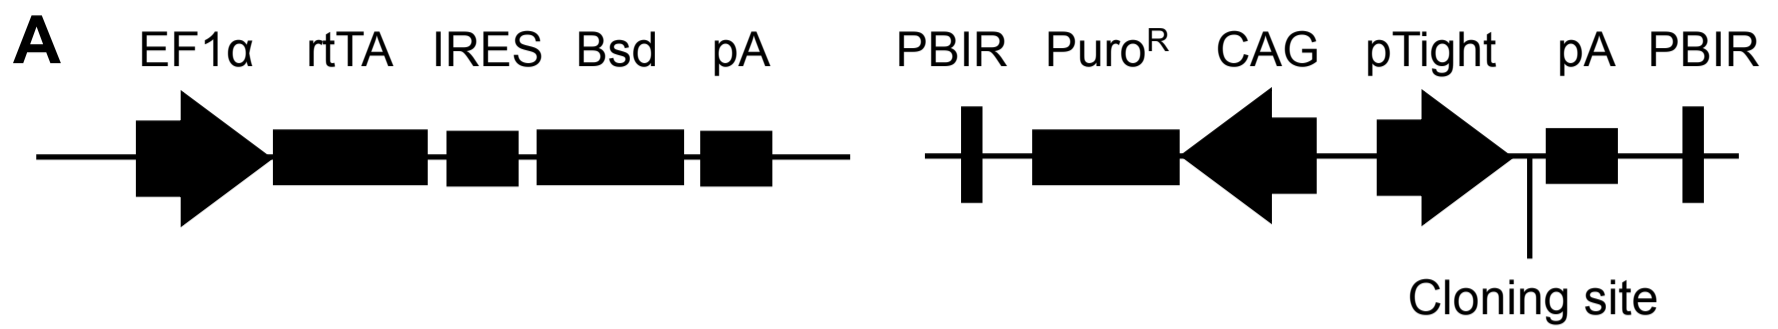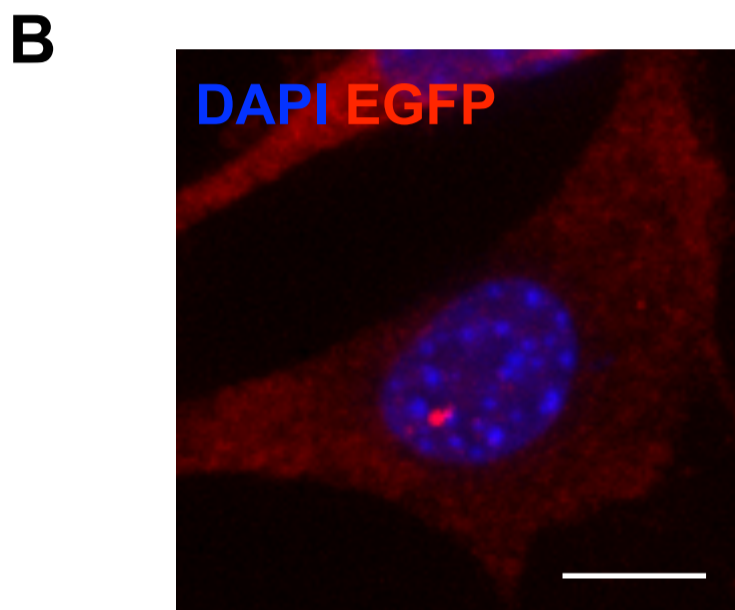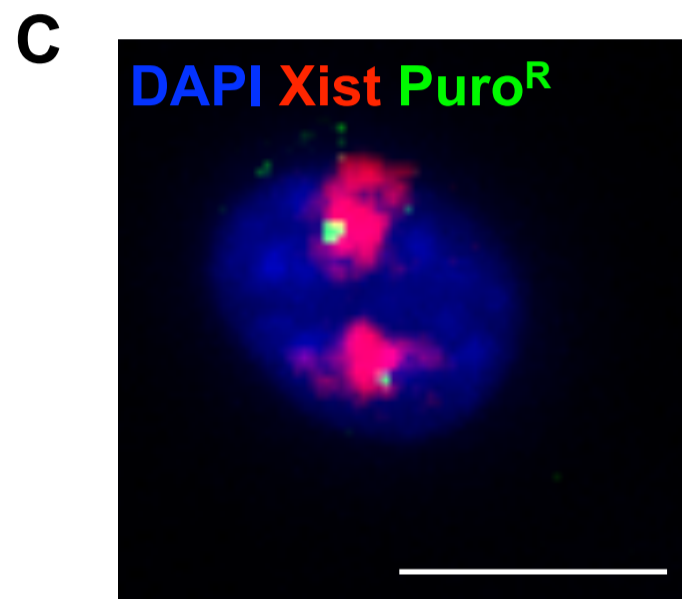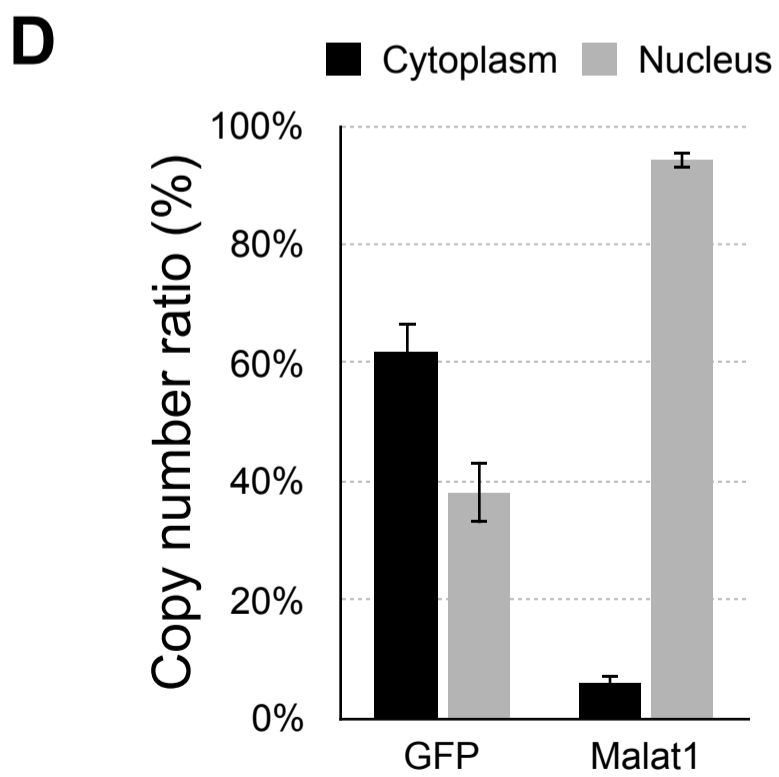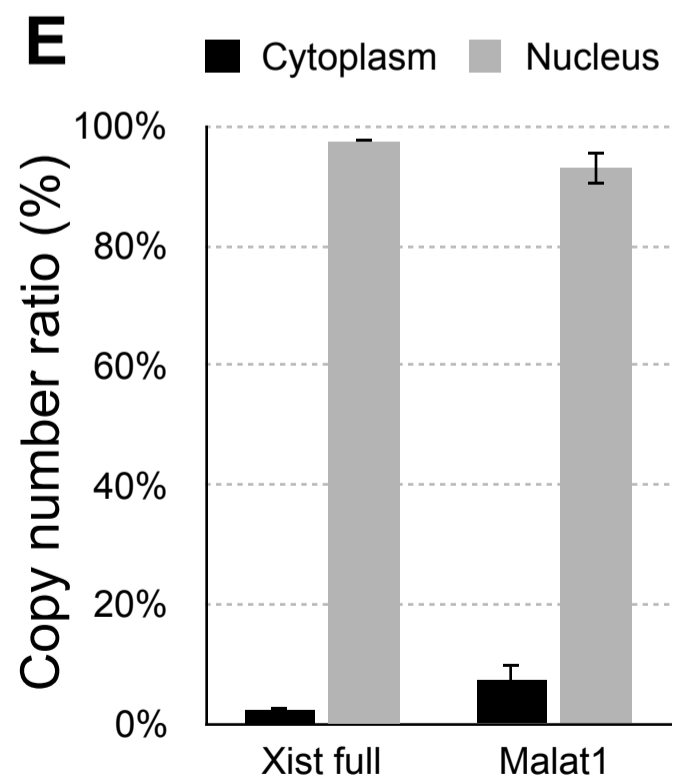

**Figure S2**

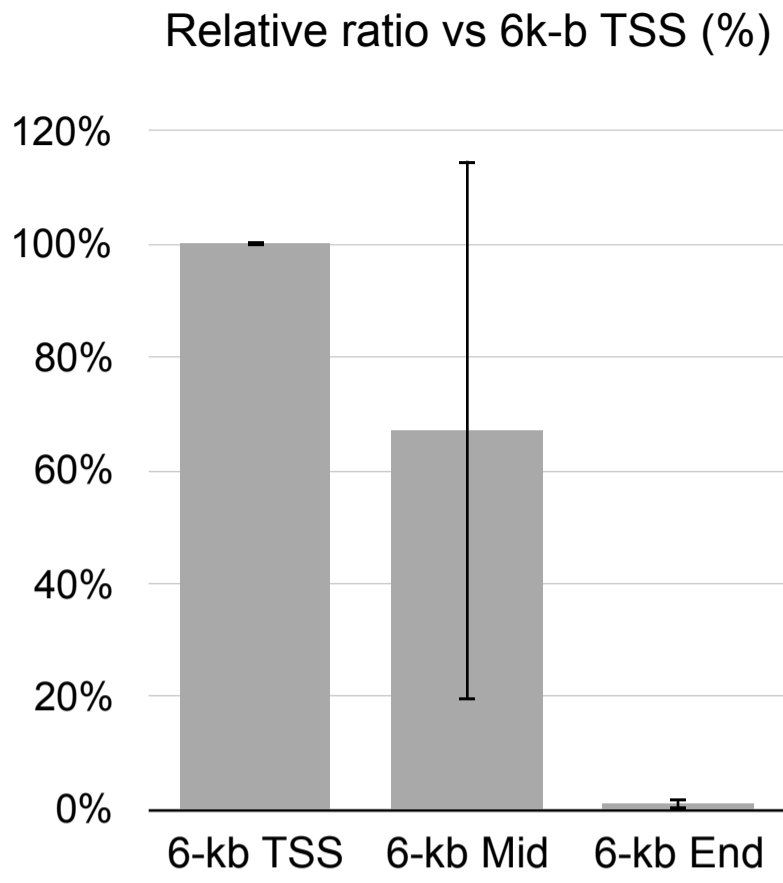

**Figure S3**

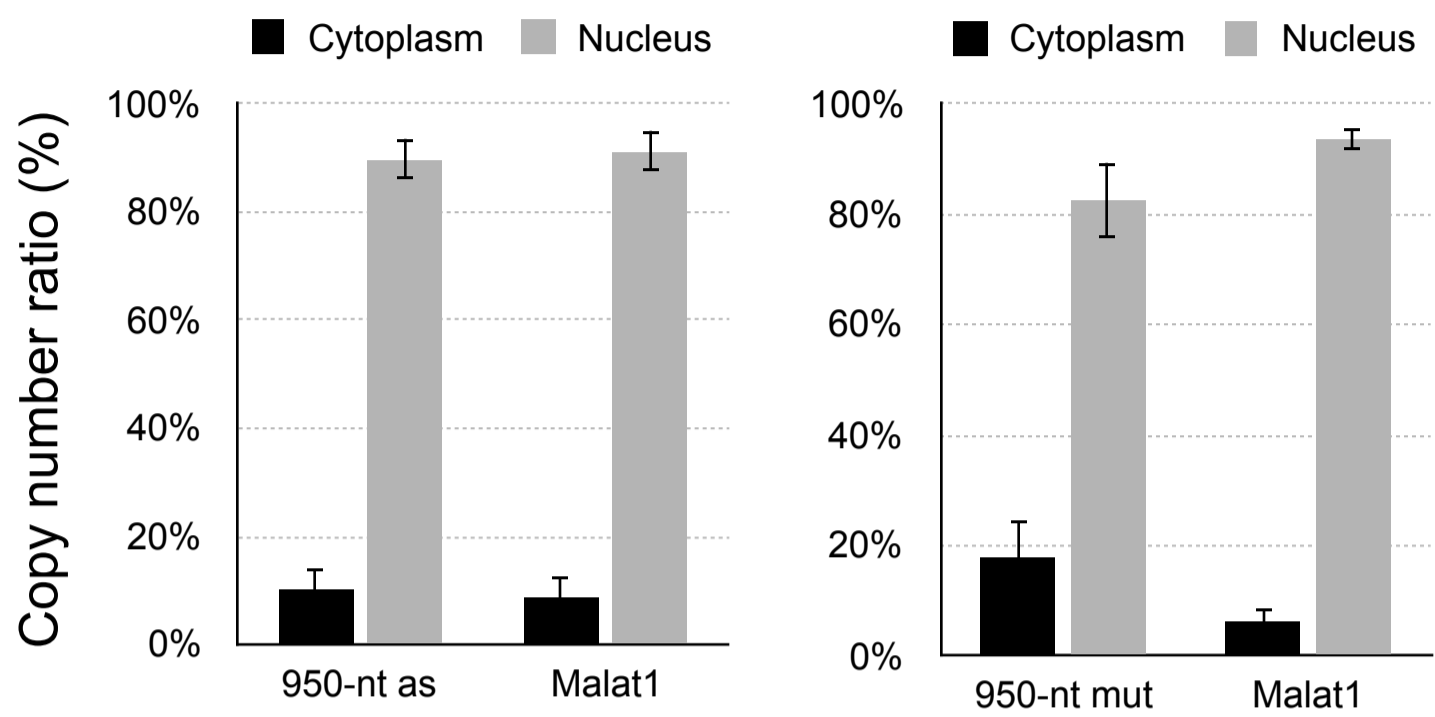

# Figure S4

**A**

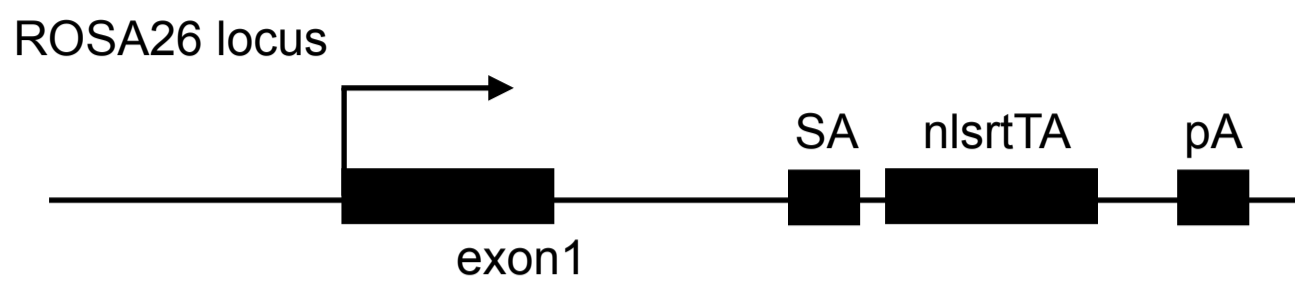

**B**

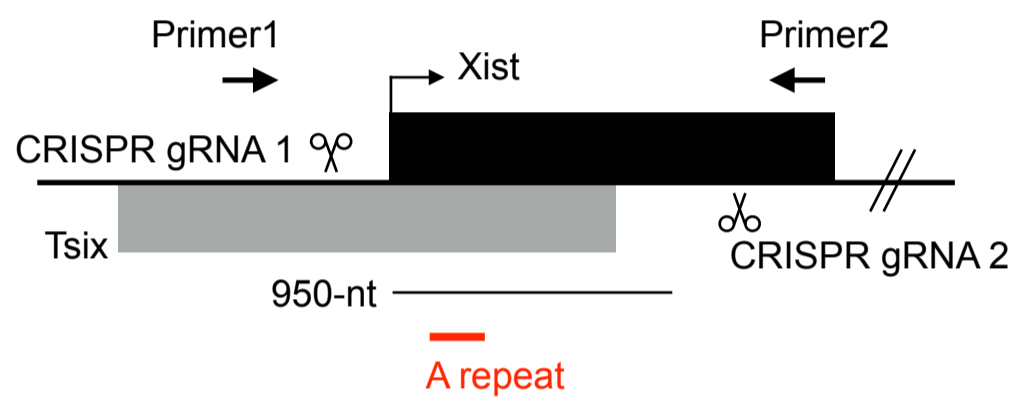

**C**

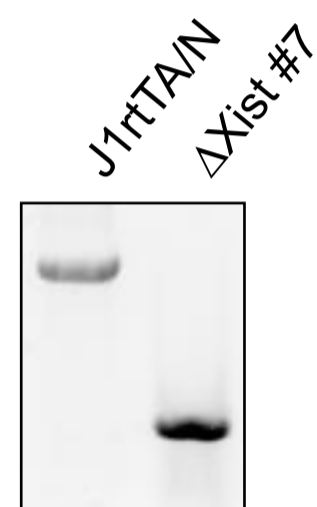

Supplement: supp_062158.117_Supplemental_Figures.pdf [file supp_062158.117_Supplemental_Figures.pdf]
